# Supplementary material
Source: Springer Nature journal article supplement (https://www.springermedizin.de/resource/supplementary/12891_2012_1662_MOESM4_ESM.pdf/9509020)

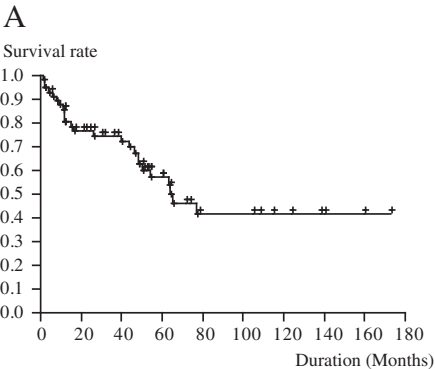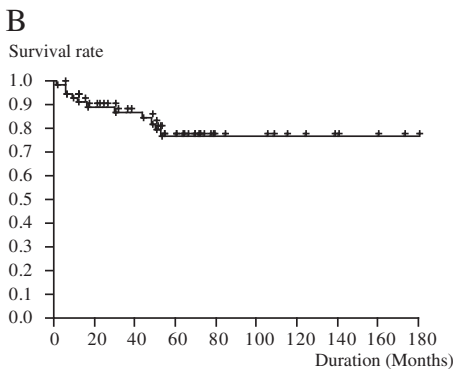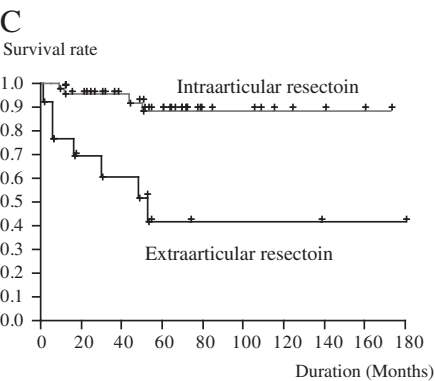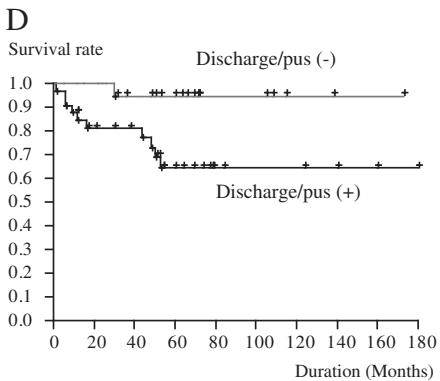

Supplement: MOESM4 [file 9509020]
